# Supplementary material for: A multifunctional PEG–PLL drug conjugate forming redox-responsive nanoparticles for intracellular drug delivery
Source: Royal Society of Chemistry journal article supplement (doi:10.1039/c5tb01027f), 2015-01-01
Supplement: c5tb01027f1.pdf [file c5tb01027f1.pdf]

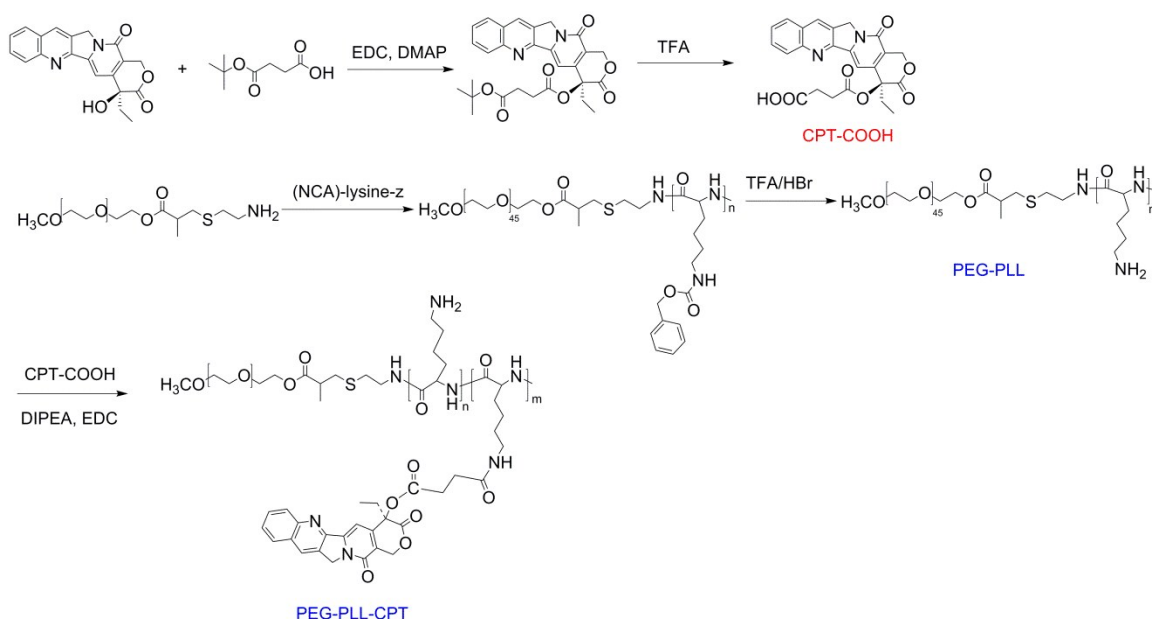

Supporting Scheme 1. The synthesis of the control CPT-drug conjugate PEG<sub>45</sub>-PLL<sub>25</sub>-CPT<sub>6</sub>.

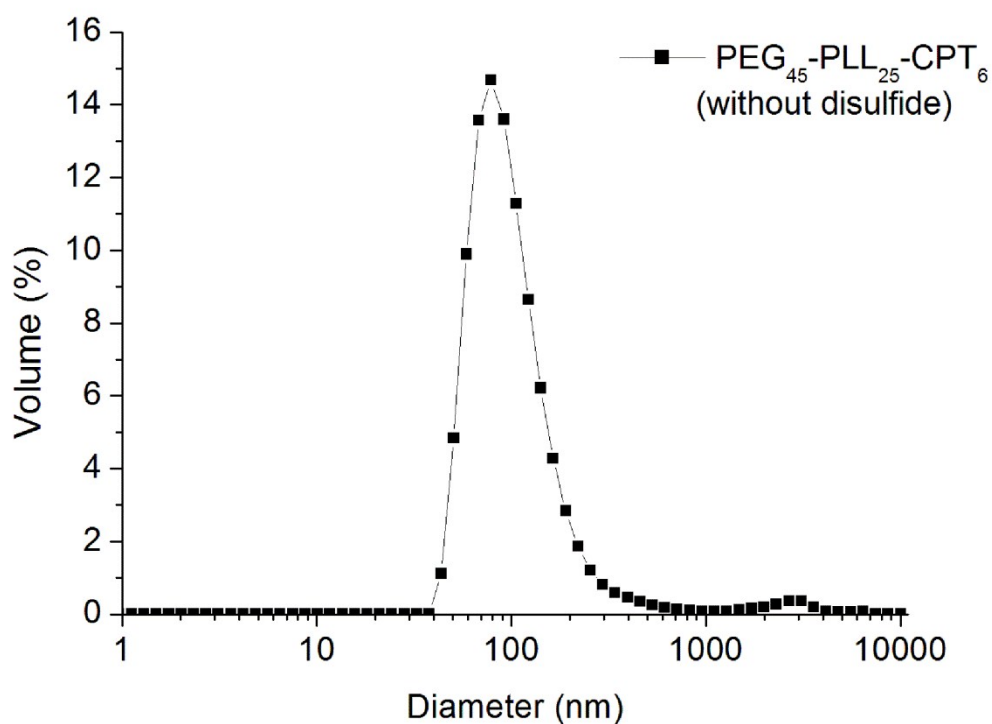

Supporting Figure 1. Micelle sizes measured by dynamic light scattering of PEG<sub>45</sub>-PLL<sub>25</sub>-CPT<sub>6</sub> (control CPT-nanoparticle, without disulfide bond).

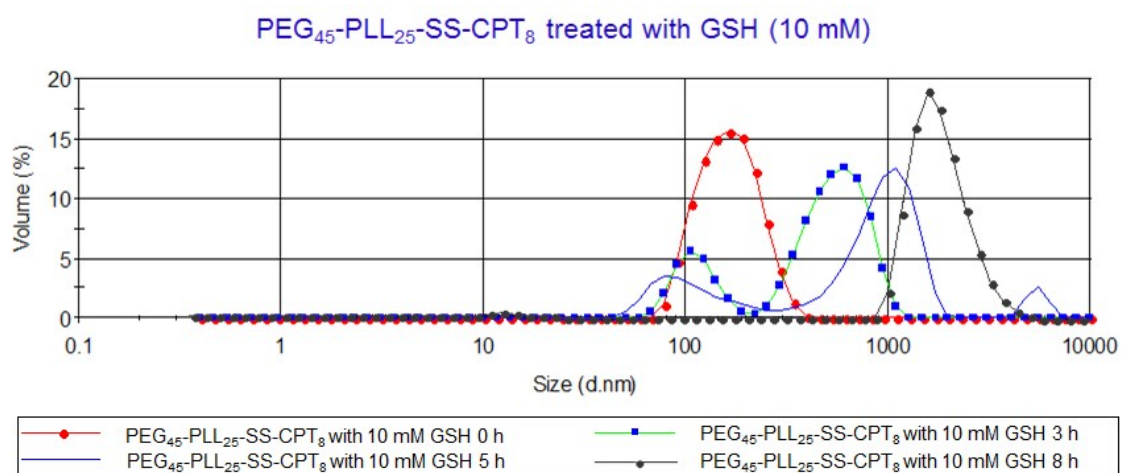

Supporting Figure 2. Micelle size change measured by dynamic light scattering of PEG<sub>45</sub>-PLL<sub>25</sub>-SS-CPT<sub>8</sub> after treated with GSH (10 mM).
